# Supplementary material
Source: PubMed Central journal article supplement (PMC6049611)

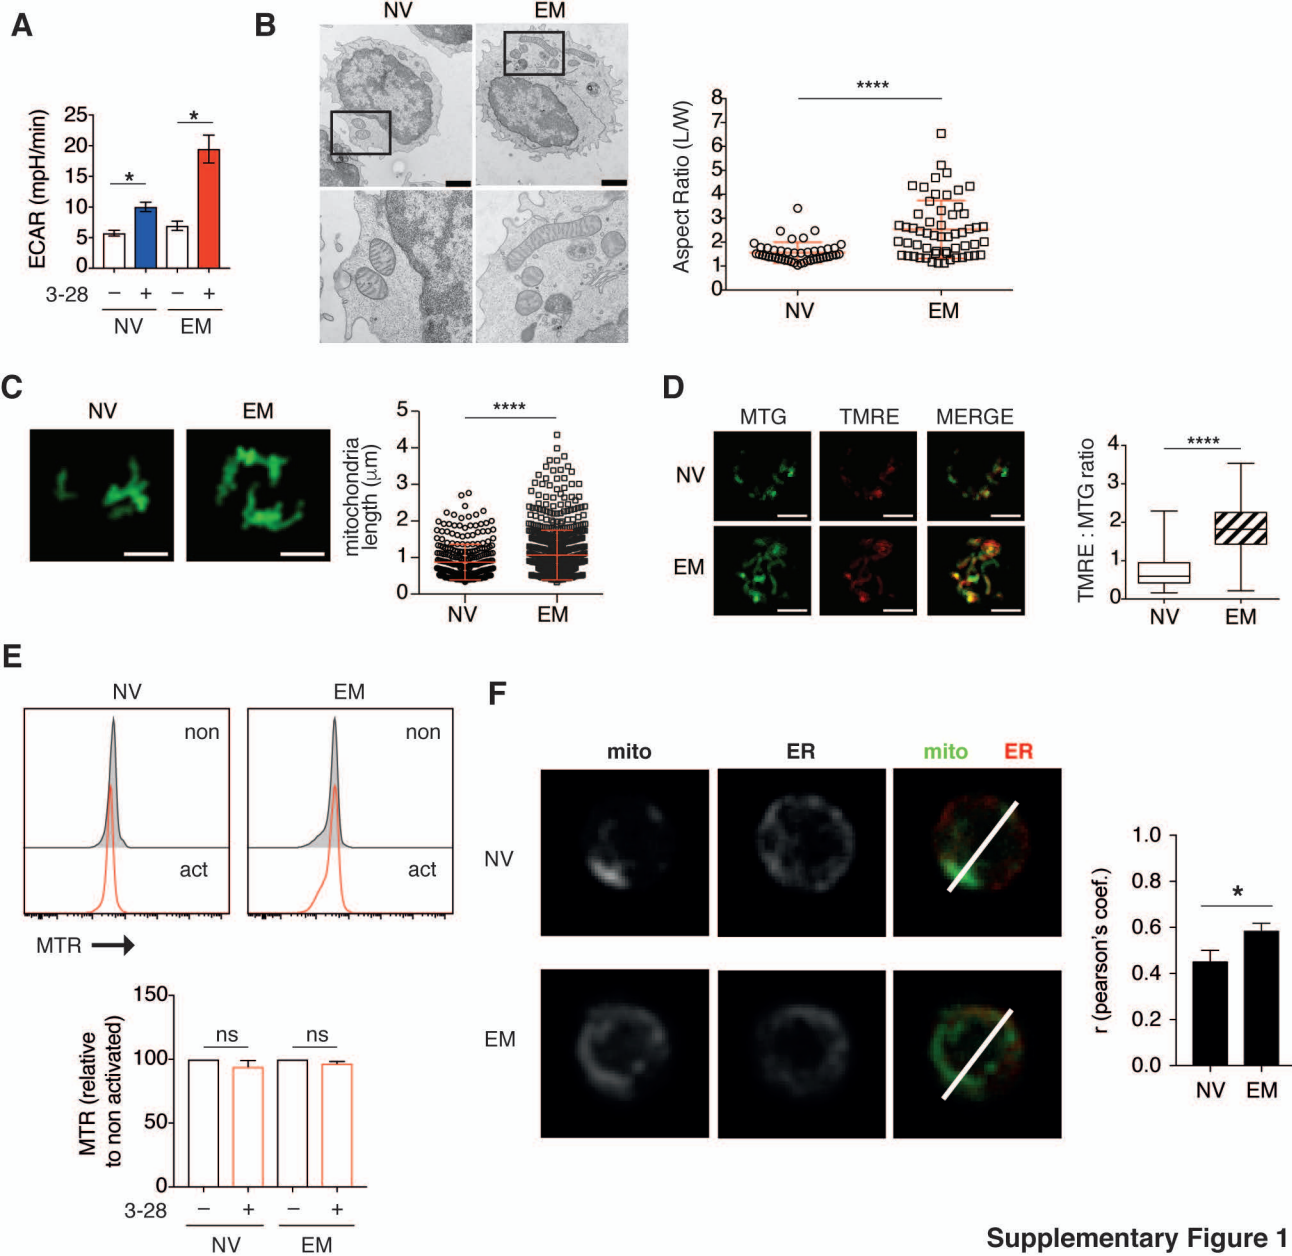

Supplementary Figure 1

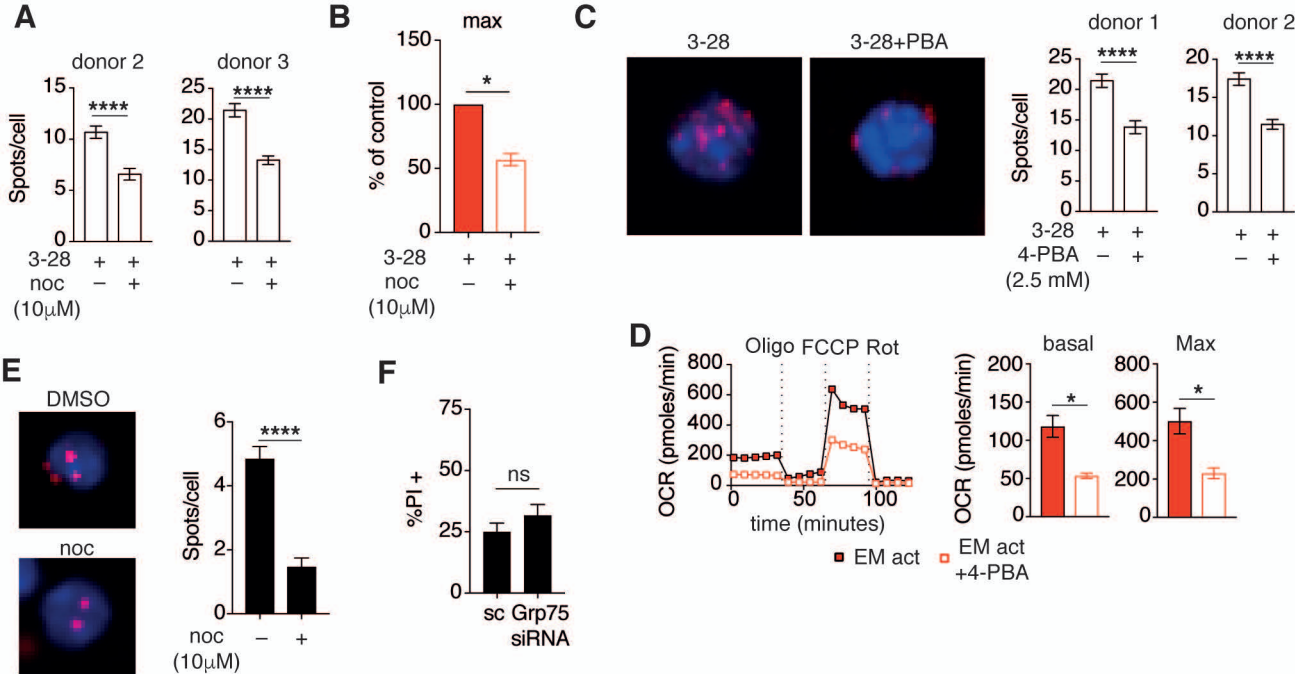

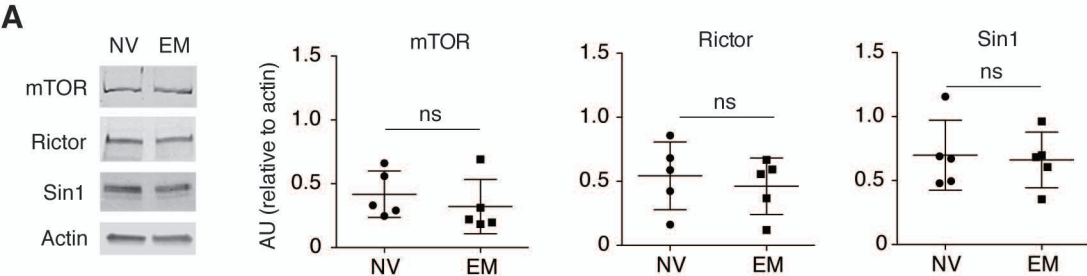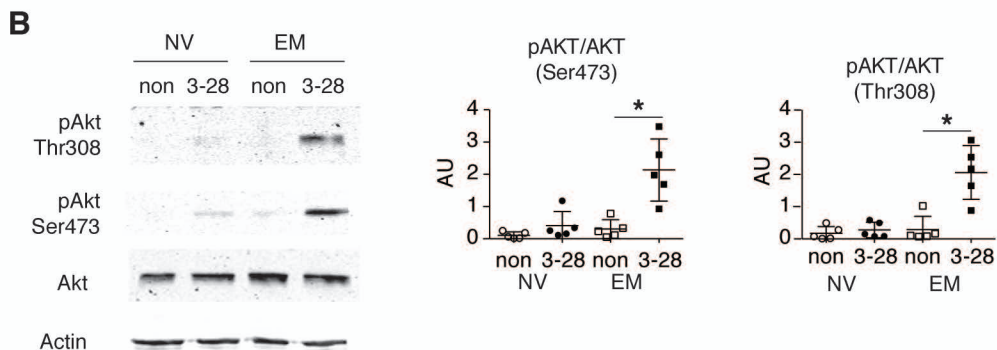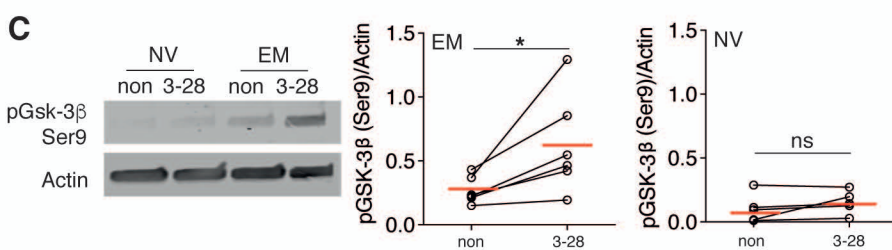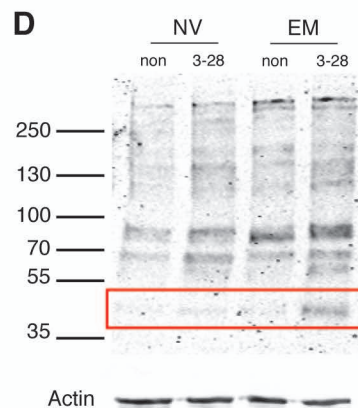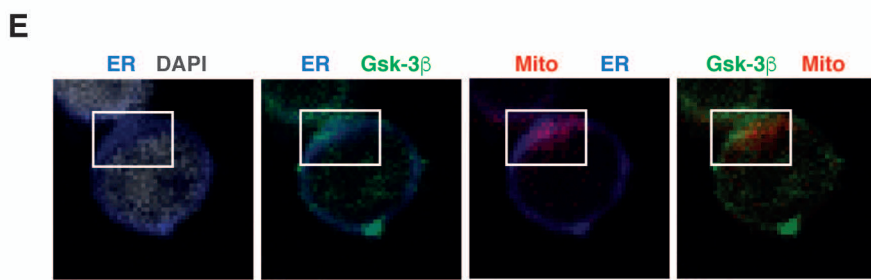

Supplementary Figure 3

**A**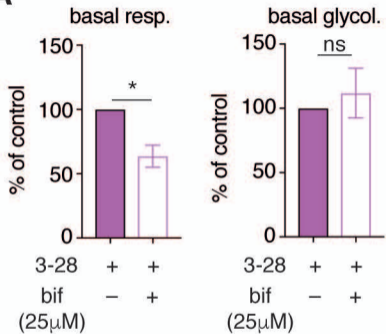**B**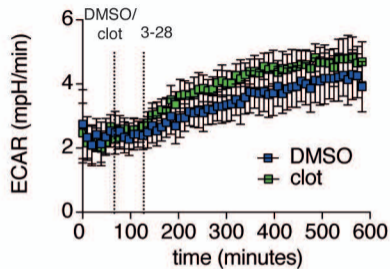**C**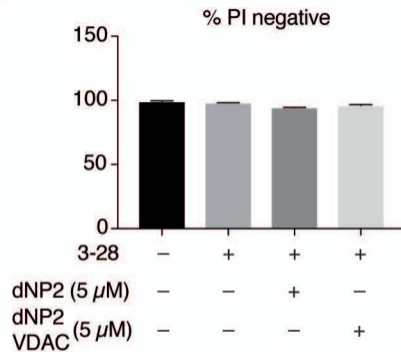

Supplementary Figure 4

**A**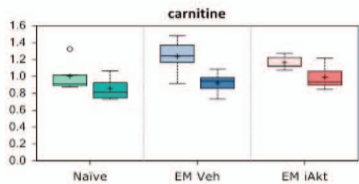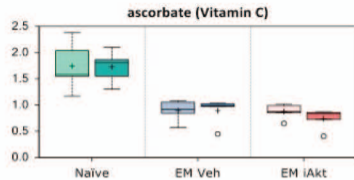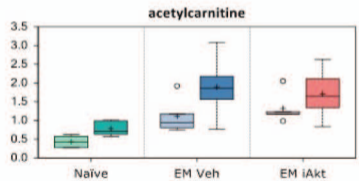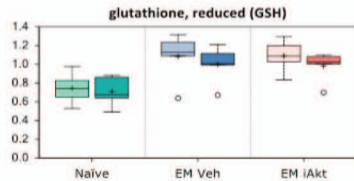

αCD3/  
αCD28

- + - + - +

- + - + - +

**B**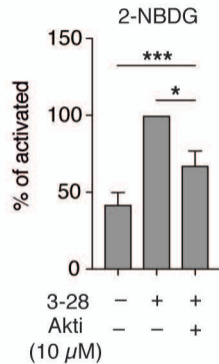

**Supplementary Figure 5**

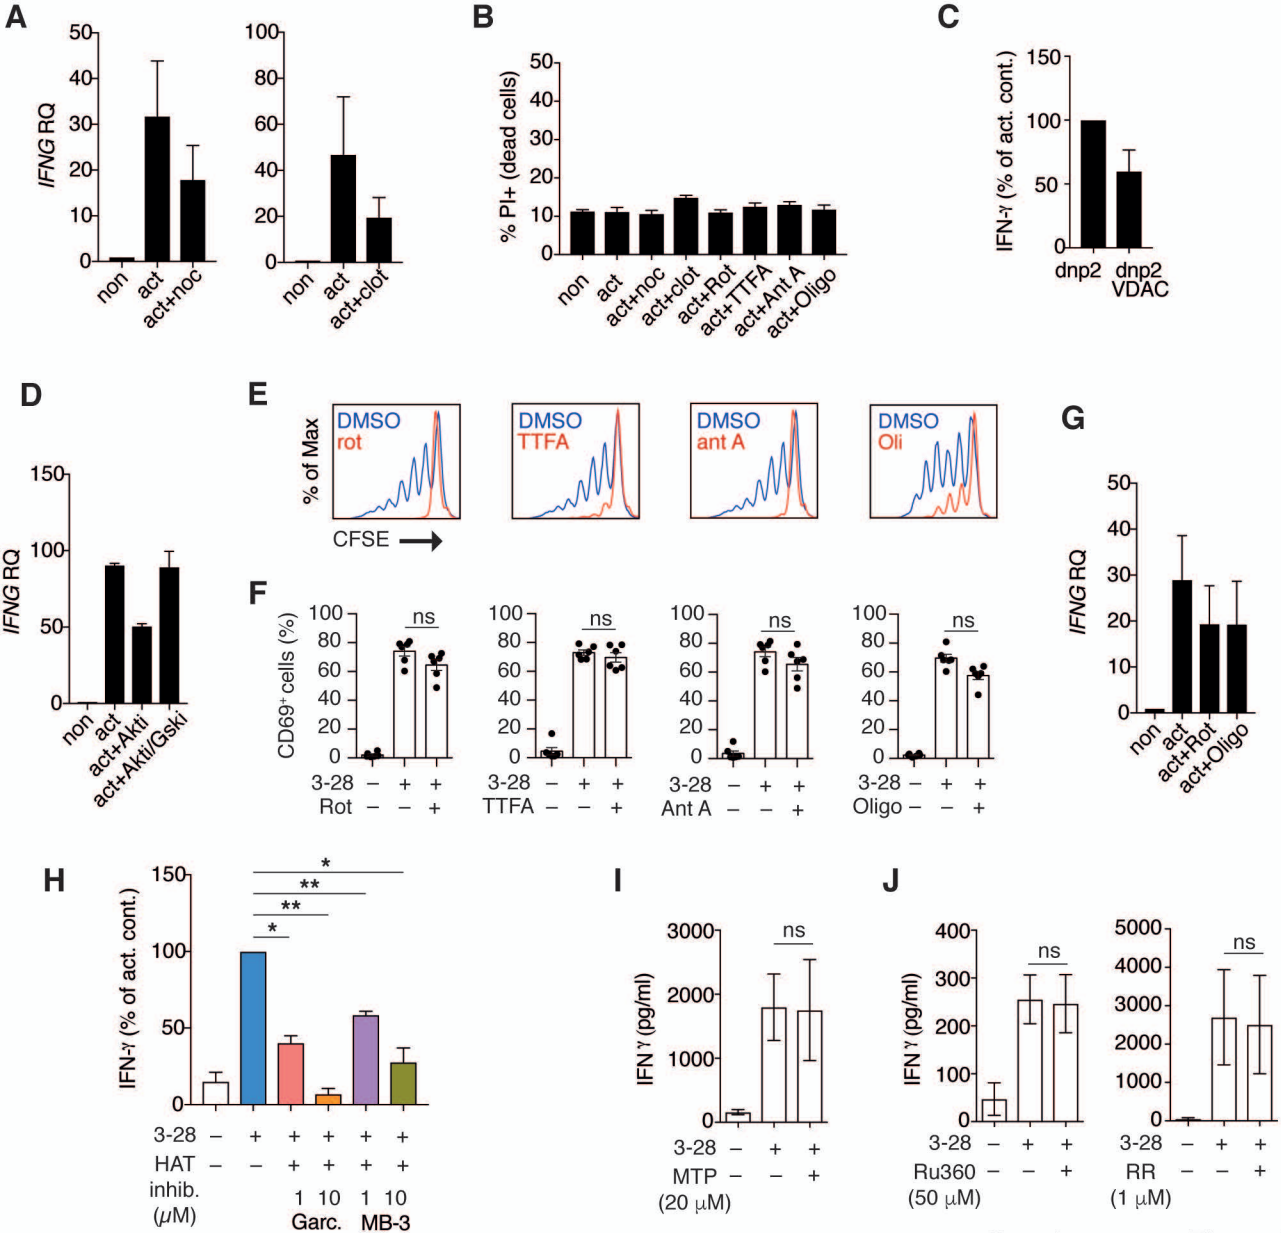

Supplementary Figure 6

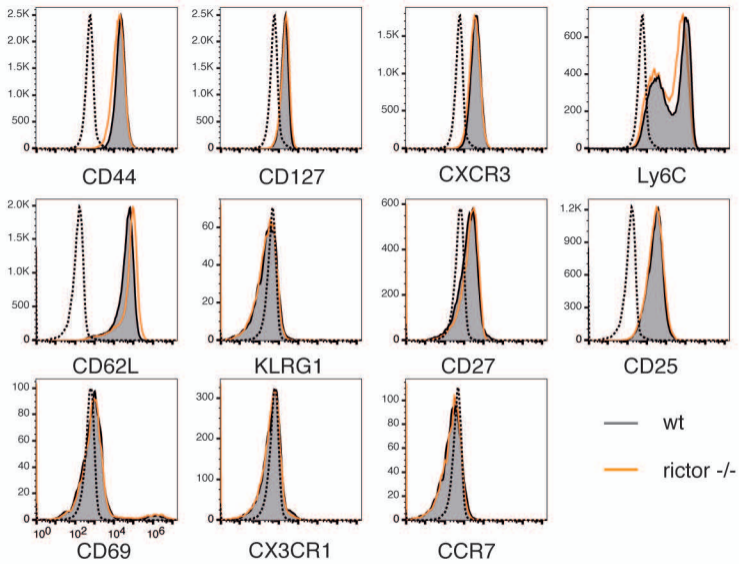

Supplementary Figure 7

Non-activated

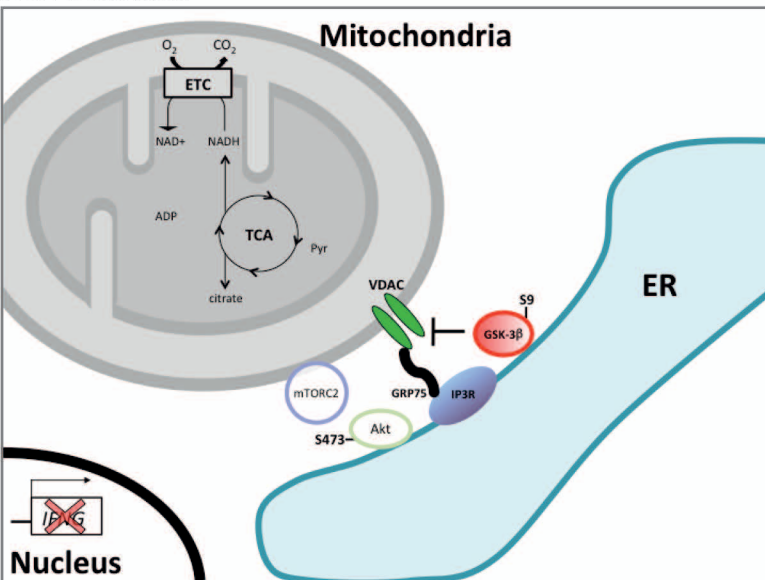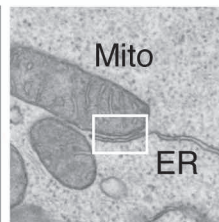

Activated

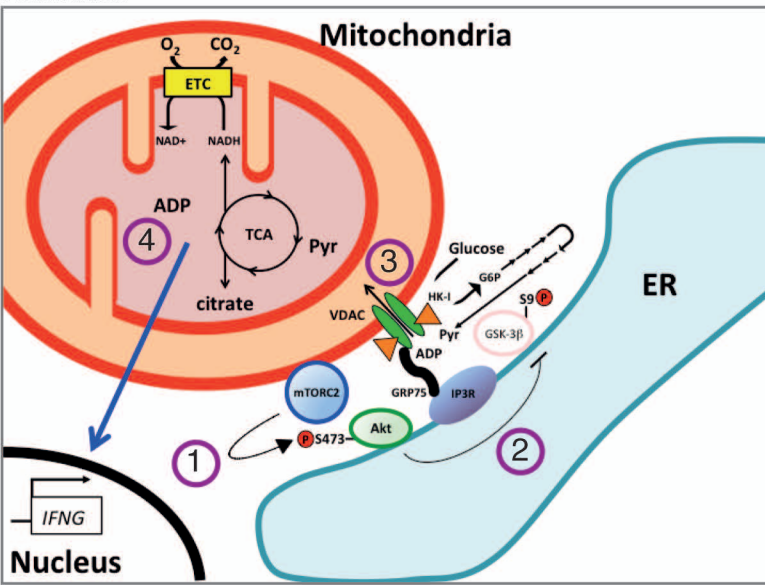

Supplement: NIHMS78126-supplement-1.pdf [file NIHMS78126-supplement-1.pdf]
